# Supplementary material for: Copper ion interaction with the RNase catalytic site fragment of the angiogenin protein: an experimental and theoretical investigation
Source: Royal Society of Chemistry journal article supplement (doi:10.1039/c7dt01209h), 2017-01-01
Supplement: c7dt01209h1.pdf [file c7dt01209h1.pdf]

# Copper ion interaction with the RNase catalytic site fragment of the Angiogenin protein: an experimental and theoretical investigation

*Antonio Magri,<sup>a</sup> Giovanni Tabbì,<sup>a</sup> Raffaella Breglia,<sup>b</sup> Luca De Gioia,<sup>c</sup> Piercarlo Fantucci,<sup>c</sup> Maurizio Bruschi<sup>b\*</sup> Raffaele P. Bonomo,<sup>d\*</sup> Diego La Mendola<sup>e\*</sup>*

<sup>a</sup>Consiglio Nazionale delle Ricerche, Istituto di Biostrutture e Bioimmagini (IBB-CNR), Via P. Gaifami 18, 95126 Catania (Italy)

<sup>b</sup>Dipartimento di Scienze dell'Ambiente e della Terra, Università di Milano-Bicocca, Piazza della Scienza 1 20126 Milan (Italy)

<sup>c</sup>Dipartimento di Biotecnologie e Bioscienze, Università di Milano-Bicocca, Piazza della Scienza 2 20126-Milan (Italy)

<sup>d</sup>Dipartimento di Scienze Chimiche, Università degli Studi di Catania, Viale A. Doria 6, 95125 Catania, (Italy)

<sup>e</sup>Dipartimento di Farmacia, Università di Pisa, Via Bonanno Pisano 6, 56126 Pisa (Italy)

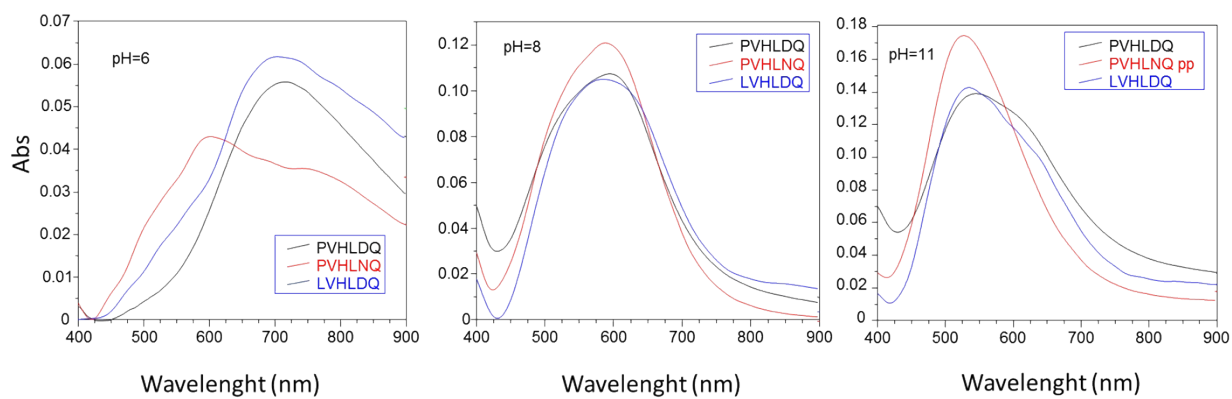

**Figure S1** Uv-Vis spectra of Cu-Ac-PVHLDQ-NH<sub>2</sub> (black), Cu-PVHLNQ-NH<sub>2</sub> (red), Cu-LVHLDQ-NH<sub>2</sub> (blue) systems recorded at different pH values. At pH=11, in the system Cu-PVHLNQ-NH<sub>2</sub>, a precipitation phenomenon was observed altering the Abs value.

**Table S1** Relevant stabilities in (kcal mol<sup>-1</sup>) of isomers of the [Cu(Ac-PVHLDQ-NH<sub>2</sub>)]<sup>-</sup>, [Cu(Ac-PVHLNQ-NH<sub>2</sub>)]<sup>0</sup>, and [Cu(Ac-LVHLDQ-NH<sub>2</sub>)]<sup>-</sup> complexes computed using the BP86/SVP and the B3LYP/BS1 schemes on the geometries computed at the BP86/SVP level (for labels see the text).

| Complex                               | $\Delta E$ | $\Delta E$ |
|---------------------------------------|------------|------------|
|                                       | BP86/SVP   | B3LYP/BS1  |
| CuL <sub>A</sub> -1                   | 25.3       | 24.7       |
| CuL <sub>A</sub> -2                   | 10.3       | 12.6       |
| CuL <sub>A</sub> -3                   | 0.0        | 0.0        |
| CuL <sub>A</sub> -W <sub>22</sub> -2  | 39.3       | 26.7       |
| CuL <sub>A</sub> -W <sub>22</sub> -3  | 0.0        | 0.0        |
| CuL <sub>B1</sub> -1                  | 4.2        | 7.3        |
| CuL <sub>B1</sub> -2                  | 0.7        | 4.2        |
| CuL <sub>B1</sub> -3                  | 4.4        | 4.6        |
| CuL <sub>B2</sub> -1                  | 5.3        | 7.3        |
| CuL <sub>B2</sub> -2                  | 5.4        | 7.6        |
| CuL <sub>B2</sub> -3                  | 0.0        | 0.0        |
| CuL <sub>B1</sub> -W <sub>22</sub> -2 | 16.9       | 19.2       |
| CuL <sub>B1</sub> -W <sub>22</sub> -3 | 12.3       | 18.3       |
| CuL <sub>B2</sub> -W <sub>22</sub> -2 | 47.1       | 41.3       |
| CuL <sub>B2</sub> -W <sub>22</sub> -3 | 0.0        | 0.0        |
| CuL <sub>C</sub> -1                   | 16.5       | 19.4       |
| CuL <sub>C</sub> -2                   | 7.0        | 7.6        |
| CuL <sub>C</sub> -3                   | 0.0        | 0.0        |
| CuL <sub>C</sub> -W <sub>22</sub> -2  | 0.0        | 0.0        |
| CuL <sub>C</sub> -W <sub>22</sub> -3  | 1.4        | 4.1        |

**Table S2** EPR g-tensors of the  $[\text{Cu}(\text{Ac-PVHLDQ-NH}_2)]^-$ ,  $[\text{Cu}(\text{Ac-PVHLNQ-NH}_2)]^0$  and  $[\text{Cu}(\text{Ac-LVHLDQ-NH}_2)]^-$  complexes computed using the B3LYP functional and the BS1 basis set on geometries optimized at the RI-BP86/SVP level of theory (for labels see the text)

| Complex                               | $g_z \equiv g_{  }$ | $g_x$ | $g_y$ | $g_{\text{iso}}$ |
|---------------------------------------|---------------------|-------|-------|------------------|
| CuL <sub>A</sub> -1                   | 2.179               | 2.036 | 2.084 | 2.099            |
| CuL <sub>A</sub> -3                   | 2.146               | 2.040 | 2.046 | 2.077            |
| CuL <sub>A</sub> -W <sub>22</sub> -2  | 2.177               | 2.051 | 2.062 | 2.096            |
| CuL <sub>A</sub> -22W-3               | 2.168               | 2.045 | 2.065 | 2.093            |
| Expt.                                 | 2.224               |       |       |                  |
| CuL <sub>B1</sub> -1                  | 2.166               | 2.029 | 2.089 | 2.095            |
| CuL <sub>B1</sub> -2                  | 2.153               | 2.037 | 2.062 | 2.084            |
| CuL <sub>B1</sub> -3                  | 2.145               | 2.041 | 2.050 | 2.079            |
| CuL <sub>B2</sub> -1                  | 2.152               | 2.042 | 2.054 | 2.083            |
| CuL <sub>B2</sub> -2                  | 2.167               | 2.046 | 2.060 | 2.091            |
| CuL <sub>B2</sub> -3                  | 2.138               | 2.041 | 2.044 | 2.074            |
| CuL <sub>B1</sub> -W <sub>22</sub> -2 | 2.159               | 2.048 | 2.053 | 2.087            |
| CuL <sub>B1</sub> -W <sub>22</sub> -3 | 2.174               | 2.056 | 2.058 | 2.096            |
| CuL <sub>B2</sub> -W <sub>22</sub> -2 | 2.156               | 2.047 | 2.051 | 2.085            |
| CuL <sub>B2</sub> -W <sub>22</sub> -3 | 2.152               | 2.045 | 2.051 | 2.083            |
| Expt.                                 | 2.220               |       |       |                  |
| CuL <sub>C</sub> -1                   | 2.160               | 2.027 | 2.074 | 2.087            |
| CuL <sub>C</sub> -2                   | 2.153               | 2.047 | 2.049 | 2.083            |
| CuL <sub>C</sub> -3                   | 2.144               | 2.037 | 2.047 | 2.076            |
| CuL <sub>C</sub> -W <sub>22</sub> -2  | 2.156               | 2.036 | 2.059 | 2.084            |
| CuL <sub>C</sub> -W <sub>22</sub> -3  | 2.163               | 2.043 | 2.061 | 2.089            |
| Expt.                                 | 2.230               |       |       |                  |

**Table S3** Mulliken atomic spin densities for the Cu ion and ligand atoms of [Cu(Ac-PVHLDQ-NH<sub>2</sub>)]<sup>-</sup>, [Cu(Ac-PVHLNQ-NH<sub>2</sub>)] and [Cu(Ac-LVHLDQ-NH<sub>2</sub>)]<sup>-</sup> complexes computed using the B3LYP functional and the BS1 basis set on geometries optimized at the RI-BP86/SVP level of theory (for complex labels see the main text)

| Complex                                  | Cu   | N <sub>HIS</sub> | N <sub>Leu</sub> | N <sub>Asp</sub> | O <sub>Asp</sub> ; O1 <sub>Asn</sub> ; O2 <sub>Asn</sub> | O <sub>Val</sub> ; O <sub>w</sub> |
|------------------------------------------|------|------------------|------------------|------------------|----------------------------------------------------------|-----------------------------------|
| <b>CuL<sub>A</sub>-1</b>                 | 0.60 | 0.03             | 0.11             | 0.12             | 0.11                                                     | 0.01                              |
| <b>CuL<sub>A</sub>-2</b>                 | 0.57 | 0.06             | 0.09             | 0.12             | 0.11                                                     | 0.00                              |
| <b>CuL<sub>A</sub>-3</b>                 | 0.56 | 0.05             | 0.12             | 0.13             | 0.09                                                     | 0.00                              |
| <b>CuL<sub>A</sub>-W<sub>22</sub>-2</b>  | 0.52 | 0.06             | 0.14             | 0.11             | 0.06                                                     | 0.00                              |
| <b>CuL<sub>A</sub>-W<sub>22</sub>-3</b>  | 0.61 | 0.06             | 0.10             | 0.13             | 0.06                                                     | 0.00                              |
| <b>CuL<sub>B1</sub>-1</b>                | 0.60 | 0.04             | 0.18             | 0.10             | 0.03                                                     | 0.01                              |
| <b>CuL<sub>B1</sub>-2</b>                | 0.57 | 0.05             | 0.15             | 0.12             | 0.04                                                     | 0.00                              |
| <b>CuL<sub>B1</sub>-3</b>                | 0.55 | 0.05             | 0.18             | 0.12             | 0.04                                                     | 0.00                              |
| <b>CuL<sub>B2</sub>-1</b>                | 0.58 | 0.04             | 0.16             | 0.15             | 0.04                                                     | 0.00                              |
| <b>CuL<sub>B2</sub>-2</b>                | 0.58 | 0.04             | 0.16             | 0.15             | 0.04                                                     | 0.00                              |
| <b>CuL<sub>B2</sub>-3</b>                | 0.60 | 0.04             | 0.13             | 0.12             | 0.05                                                     | 0.00                              |
| <b>CuL<sub>B1</sub>-W<sub>22</sub>-2</b> | 0.59 | 0.06             | 0.12             | 0.12             | 0.06                                                     | 0.00                              |
| <b>CuL<sub>B1</sub>-W<sub>22</sub>-3</b> | 0.62 | 0.05             | 0.15             | 0.12             | 0.04                                                     | 0.00                              |
| <b>CuL<sub>B2</sub>-W<sub>22</sub>-2</b> | 0.60 | 0.05             | 0.15             | 0.12             | 0.04                                                     | 0.00                              |
| <b>CuL<sub>B2</sub>-W<sub>22</sub>-3</b> | 0.59 | 0.06             | 0.13             | 0.12             | 0.06                                                     | 0.00                              |
| <b>CuL<sub>C</sub>-1</b>                 | 0.59 | 0.05             | 0.10             | 0.12             | 0.11                                                     | 0.00                              |
| <b>CuL<sub>C</sub>-2</b>                 | 0.57 | 0.05             | 0.08             | 0.13             | 0.10                                                     | 0.00                              |
| <b>CuL<sub>C</sub>-3</b>                 | 0.55 | 0.04             | 0.09             | 0.15             | 0.13                                                     | 0.00                              |
| <b>CuL<sub>C</sub>-W<sub>22</sub>-2</b>  | 0.59 | 0.05             | 0.12             | 0.15             | 0.06                                                     | 0.00                              |
| <b>CuL<sub>C</sub>-W<sub>22</sub>-3</b>  | 0.61 | 0.06             | 0.11             | 0.13             | 0.07                                                     | 0.00                              |
